# Supplementary material
Source: PubMed Central journal article supplement (PMC5706782)
Supplement: NIHMS922097-supplement-Appendix.pdf [file NIHMS922097-supplement-Appendix.pdf]

**Clinical Practice:** Delirium in Hospitalized Older Adults

**Author:** Edward R. Marcantonio, M.D. S.M.

## **Supplemental Appendix**

### **Table of Contents:**

**Supplementary Table 1: Four Validated Brief Delirium Assessment Tools**

**Supplementary Table 1: Four Validated Brief Delirium Assessment Tools**

| <b>Instrument</b>                                                                                                                     | <b>CAM based?</b> | <b>Target Population</b>                                      | <b>Brief Description of Assessment</b>                                                                                                                                                                                                                                                                                                                                       | <b>Validation Study</b>                                                                                                                                                                       | <b>Test Characteristics</b>                                                                                                     | <b>Comments</b>                                                                                                                                          |
|---------------------------------------------------------------------------------------------------------------------------------------|-------------------|---------------------------------------------------------------|------------------------------------------------------------------------------------------------------------------------------------------------------------------------------------------------------------------------------------------------------------------------------------------------------------------------------------------------------------------------------|-----------------------------------------------------------------------------------------------------------------------------------------------------------------------------------------------|---------------------------------------------------------------------------------------------------------------------------------|----------------------------------------------------------------------------------------------------------------------------------------------------------|
| <b>CAM- ICU</b> <sup>32</sup><br>Confusion Assessment Method for the Intensive Care Unit                                              | Yes               | Intensive Care Unit, especially non-verbal intubated patients | . Administer RASS—markedly abnormal, stop, consider “delirious”<br>. Administer CAM-ICU:<br>--Assess attention: Vigilance A test with HAVEAHAART and picture recognition task<br>--Assess disorganized thinking: follow commands, 4 yes/no questions<br>--Assess acute change, altered level of consciousness using the RASS                                                 | 471 daily evaluations of 96 ICU patients<br>Mean age: 55.3 years<br>Delirium: 83%<br>Dementia: 13% Reference standard: Geriatrician, psychiatrist, or neuropsychologist using DSM-IV criteria | <i>Overall:</i><br>Sensitivity: 93%-100%<br>Specificity: 98%-100%<br><i>Dementia:</i><br>Sensitivity: 100%<br>Specificity: 100% | Several studies report lower sensitivity when applied to verbal patients with less severe delirium<br><br><i>Available at:</i><br><i>Icudelirium.org</i> |
| <b>B-CAM</b> <sup>33</sup><br>Brief CAM                                                                                               | Yes               | Emergency Department                                          | . Delirium Triage Screen: RASS plus “lunch” backwards. If both normal/correct, then stop.<br>. If triage screen positive, administer B-CAM: similar to CAM-ICU except months of year backwards to July is substituted to test attention                                                                                                                                      | 406 emergency department patients Mean age: 73.5 years<br>Delirium: 12%<br>Dementia: 6% Reference standard: Psychiatrist using DSM- IV criteria                                               | <i>Overall:</i><br>Sensitivity: 78%–82%<br>Specificity: 96-97%<br><i>Dementia:</i> results not available                        | Modification of the CAM-ICU designed for verbal patients.<br><br><i>Available at:</i><br><i>Icudelirium.org</i>                                          |
| <b>4AT</b> <sup>34</sup>                                                                                                              | No                | General Medicine and Surgery                                  | Assess 4 items:<br>Alertness: level of consciousness<br>Orientation: Age, date of birth, place, year<br>Attention: Months of the Year backwards<br>Acute change/fluctuations                                                                                                                                                                                                 | 236 patients on geriatrics or rehabilitation ward Mean age: 83.9 years<br>Delirium: 12%<br>Dementia: 31% Reference standard: Clinical assessment by geriatrician                              | <i>Overall:</i><br>Sensitivity: 90%<br>Specificity: 84%<br><i>Dementia:</i> Sensitivity 94%,<br>Specificity 65%                 | Brief instrument with a 0–12 score; scores ≥4 indicative of delirium<br><br><i>Available at:</i><br><i>The4AT.com</i>                                    |
| <b>3D-CAM</b> <sup>35</sup><br>3-Minute Diagnostic Interview for Delirium using the Confusion Assessment Method (See <b>Table 2</b> ) | Yes               | General Medicine and Surgery                                  | Assess 4 CAM diagnostic features:<br>--Acute change: 3 patient-reported symptoms<br>--Attention: days of week, months of year backwards, Digit span 3 and 4 backwards<br>--Disorganized thinking: orientation to type of place, year, day of the week<br>--Observe level of consciousness<br>--Optional: 8 interviewer observations linked to CAM features, 1 proxy question | 201 patients on an acute general medicine unit<br>Mean age: 84.5 years<br>Delirium: 21%<br>Dementia: 28%<br>Reference standard: Expert panel using DSM-IV criteria                            | <i>Overall:</i><br>Sensitivity: 95%<br>Specificity: 94%<br><i>Dementia:</i><br>Sensitivity: 96%<br>Specificity: 86%             | Items selected using Item Response Theory<br><br><i>Available at:</i><br><i>HospitalElderLife Program.org</i>                                            |

Table Abbreviations: RASS-Richmond Agitation and Sedation Scale, CAM-Confusion Assessment Method, DSM-IV-Diagnostic and Statistical Manual, 4th Edition
